# Supplementary material
Source: HighWire-hosted journal article supplement (https://erj.ersjournals.com/content/52/5/1801393)
Supplement: inline-supplementary-material-1 [file inline-supplementary-material-1.pdf]

# **Matching-Adjusted Indirect Comparison of Benralizumab vs. Mepolizumab and Reslizumab: Systematic Review**

## **APPENDICES**

### **Contents**

|                                                                                                                                                                                                                     |    |
|---------------------------------------------------------------------------------------------------------------------------------------------------------------------------------------------------------------------|----|
| APPENDIX 1: SUPPLEMENTAL METHODS                                                                                                                                                                                    | 3  |
| Table S1. Database search strategies                                                                                                                                                                                | 6  |
| Table S2. Eligibility criteria applied to the search results                                                                                                                                                        | 11 |
| Figure S1. Methods for conducting the systematic review                                                                                                                                                             | 13 |
| Figure S2. Anchored methods for population-adjusted indirect comparisons                                                                                                                                            | 14 |
| APPENDIX 2: SUPPLEMENTAL RESULTS                                                                                                                                                                                    | 15 |
| Table S3. Studies identified by the systematic review                                                                                                                                                               | 18 |
| Table S4. Summary of study characteristics of benralizumab, mepolizumab, and reslizumab studies                                                                                                                     | 20 |
| Table S5. Comparison of baseline characteristics of patients before and after matching for the analysis of prebronchodilator FEV <sub>1</sub> change from baseline to the end of each study                         | 22 |
| Table S6. Comparison of baseline characteristics of patients before and after matching for the analysis of prebronchodilator FEV <sub>1</sub> change from baseline to the end of each study (excluding MENSA trial) | 24 |

|                                                                                                                                                                                                                                                                                                     |    |
|-----------------------------------------------------------------------------------------------------------------------------------------------------------------------------------------------------------------------------------------------------------------------------------------------------|----|
| Table S7. Benralizumab vs. mepolizumab analysis including MUSCA study: Baseline characteristics of patients before and after matching                                                                                                                                                               | 26 |
| Table S8. Benralizumab vs. mepolizumab analysis including MUSCA study: Matched and unmatched treatment comparisons of clinically significant asthma exacerbations and asthma exacerbations resulting in ED visit or hospitalisation, and change from baseline in prebronchodilator FEV <sub>1</sub> | 27 |
| Figure S3. Evidence networks for comparisons of benralizumab with mepolizumab and reslizumab for patients with severe, uncontrolled asthma                                                                                                                                                          | 28 |
| APPENDIX 3: REFERENCES                                                                                                                                                                                                                                                                              | 29 |

## APPENDIX 1: METHODS

### Systematic Review

This systematic review was conducted in accordance with the University of York Centre for Reviews and Dissemination standards and Cochrane standards. The purpose of the review was to identify randomised controlled trials that evaluated efficacy, safety, and tolerability of biologic treatments for patients with severe, uncontrolled asthma receiving medium- or high-dosage inhaled corticosteroids (ICS) plus an additional controller medication. A full protocol was developed for searching, screening, extracting information, and evaluating the data; the protocol was not registered.

Data sources included biomedical databases, conference proceedings, bibliographies, and clinical trial registries. Databases were searched from study inception to 3 August 2016, and included Embase<sup>®</sup>, MEDLINE<sup>®</sup>, MEDLINE<sup>®</sup> In-Process, and Cochrane Central Register of Controlled Trials (CENTRAL) (**Table S1**). On 18 July 2016, the past 3 years of the American Thoracic Society, European Respiratory Society, and American College of Chest Physician conference proceedings were searched for studies that were not yet published in journals as full-text articles. The online clinical trial registries included ClinicalTrials.gov, the World Health Organization Indicator Metadata Registry, the Australian New Zealand Clinical Trials Registry, the European Union Clinical Trials Register, and PharmNet.Bund Klinische Prüfungen and Arzneimittel-Informationssystem. Manufacturer websites also were searched for unpublished data, such as clinical study reports.

Predefined eligibility criteria (specific patient populations, interventions, treatment comparators, outcomes, and study designs [**Table S2**]) were applied to the search results. Eligible studies were identified by the systematic application of criteria by two independent reviewers, with discrepancies adjudicated by a third reviewer. Methods for selection, extraction, and feasibility analyses are depicted in **Figure S1**.

### **Selection of Treatment Modifiers for MAIC Analysis**

We identified potential treatment effect modifiers through the following multi-step process: open elicitation of opinions from asthma experts, literature search for variables that modified treatment effects in studies of severe asthma, univariate and multivariate analysis of SIROCCO and CALIMA data to determine statistical predictors of outcomes of interest, and assessment of methods and baseline characteristics for trials included in the MAIC to determine which predictor variables were different across comparator trial populations.

Benralizumab vs. mepolizumab modifiers. Although the benralizumab and mepolizumab trial designs were similar overall, they varied in their definition of ICS dosage and eosinophil count required at baseline as well as treatment duration (SIROCCO, 48 weeks; CALIMA, 56 weeks; MENSA, 32 weeks; DREAM, 52 weeks). The populations also differed in baseline eosinophil count, prior history of exacerbations, and the percentage of patients using OCS at baseline. Based on their clinical and statistical importance in explaining variability in the outcomes of interest, the following variables were selected for matching: eosinophil count ( $\geq 300$  cells/ $\mu$ L vs.  $< 300$  cells/ $\mu$ L), IgE count ( $< 30$  IU/mL vs.  $> 30$ – $\leq 700$  IU/mL vs.  $> 700$  IU/mL), exacerbations in the previous 12 months (two vs. more than two), presence of nasal polyps, mean body mass index, sex, and maintenance OCS use.

Benralizumab vs. reslizumab modifiers. The study inclusion criteria for benralizumab vs. reslizumab differed in terms of disease severity, medium-dosage ICS definition and dosage at baseline, exacerbation history in the previous year, and baseline eosinophil count. A comparison of baseline characteristics for the two populations demonstrated that number of exacerbations in the prior year was greater for the benralizumab studies and baseline eosinophil count was greater in the reslizumab studies. Based on their clinical and statistical importance in explaining variability in the outcomes of interest, the following variables were selected for matching: mean baseline eosinophil count, mean number of exacerbations in the previous 12 months, sex, and maintenance OCS use.

### **Benralizumab vs. Mepolizumab: Sensitivity Analyses**

The mepolizumab MUSCA trial [1] was not included in the systematic review because it was not published at the time. Therefore, it was not included in the main benralizumab vs. mepolizumab matching-adjusted indirect comparison (MAIC) analysis. However, MUSCA was included in sensitivity analyses of exacerbations and prebronchodilator forced expiratory volume in 1 second (FEV<sub>1</sub>) at Week 24.

**Table S1. Database search strategies**

**Database searched:** Embase<sup>®</sup> and MEDLINE<sup>®</sup> (Embase.com) on 17 June 2016 (without dupilumab).

|   | Search history                                                                                                                                                                                                                                                                                                                                                                                                                                                                                                                                                                                                                                                                                                                                                                                                                                                                                                                                                                                                                                                                                                                                                                                                                                                                                                                                                                                                                                         | Facet           | Hits       |
|---|--------------------------------------------------------------------------------------------------------------------------------------------------------------------------------------------------------------------------------------------------------------------------------------------------------------------------------------------------------------------------------------------------------------------------------------------------------------------------------------------------------------------------------------------------------------------------------------------------------------------------------------------------------------------------------------------------------------------------------------------------------------------------------------------------------------------------------------------------------------------------------------------------------------------------------------------------------------------------------------------------------------------------------------------------------------------------------------------------------------------------------------------------------------------------------------------------------------------------------------------------------------------------------------------------------------------------------------------------------------------------------------------------------------------------------------------------------|-----------------|------------|
| 1 | 'asthma'/syn OR 'asthma/de' OR 'severe persistent asthma'/syn OR 'asthma bronchiale' OR 'asthma, bronchial' OR 'asthmatic' OR 'asthmatic subject' OR 'bronchial asthma' OR 'bronchus asthma' OR 'childhood asthma' OR 'chronic asthma' OR 'lung allergy' OR 'inadequately controlled asthma' OR asthma* NEAR/4 (severe OR uncontrol*)                                                                                                                                                                                                                                                                                                                                                                                                                                                                                                                                                                                                                                                                                                                                                                                                                                                                                                                                                                                                                                                                                                                  | Disease         | 261,101    |
| 2 | 'prospective study'/exp OR 'randomization'/de OR 'controlled study'/de OR 'single blind procedure'/de OR 'double blind procedure'/de OR 'crossover procedure'/de OR 'placebo'/de OR 'clinical trial' OR 'clinical trials' OR 'controlled clinical trial' OR 'controlled clinical trials' OR 'randomised controlled trial' OR 'randomized controlled trial' OR 'randomised controlled trials' OR 'randomized controlled trials' OR 'randomisation' OR 'randomization' OR random* OR rct OR 'random allocation' OR 'random assignment' OR 'randomly allocated' OR 'randomly assigned' OR 'allocated randomly' OR 'assigned randomly' OR allocated NEAR/2 random OR assign* NEAR/2 random* OR randomi* OR (single OR double OR triple OR treble) NEAR/1 (blind* OR mask*) OR placebo* OR 'prospective study'/de OR nrct OR 'n rct' OR n?rct OR non NEAR/2 random* OR 'controlled clinical trial'/exp OR 'intervention study'/exp OR (clinical NEXT/1 trial*):ab,ti OR 'major clinical study'/exp OR compar*:ab,ti OR group*:ab,ti OR 'cohort analysis'/exp OR 'longitudinal study'/exp OR 'retrospective study'/exp OR 'follow up'/exp OR cohort*:ab,ti OR (('follow up' OR followup) NEXT/1 (study OR studies)):ab,ti OR 'open study'/exp OR (case* NEXT/1 control*):ab,ti OR 'clinical trial'/exp OR 'clinical article'/exp OR 'survival'/exp OR 'case control study'/exp NOT ('letter'/de OR 'abstract report'/de OR 'case report' OR 'case study'/de) | Study design    | 12,573,022 |
| 3 | 'biologic agent' OR 'omalizumab'/syn OR 'hu 901' OR 'hu901' OR 'monoclonal antibody e 25' OR 'monoclonal antibody e25' OR 'olizumab' OR 'xolair' OR 'mepolizumab'/syn OR 'bosatria' OR 'nucala' OR 'sb 240563' OR 'sb-240563' OR 'sb240563' OR 'reslizumab'/syn OR 'reslizumab' OR 'sch 55700' OR 'sch55700' OR 'benralizumab'/syn OR 'medi 563' OR 'medi563' OR CINQAIR OR CINQAERO                                                                                                                                                                                                                                                                                                                                                                                                                                                                                                                                                                                                                                                                                                                                                                                                                                                                                                                                                                                                                                                                   | Interventions   | 6,926      |
| 4 | #1 AND #2 AND #3                                                                                                                                                                                                                                                                                                                                                                                                                                                                                                                                                                                                                                                                                                                                                                                                                                                                                                                                                                                                                                                                                                                                                                                                                                                                                                                                                                                                                                       | Combined search | 2,601      |
| 5 | #4 AND [animals]/lim NOT ([humans]/lim AND [animals]/lim)                                                                                                                                                                                                                                                                                                                                                                                                                                                                                                                                                                                                                                                                                                                                                                                                                                                                                                                                                                                                                                                                                                                                                                                                                                                                                                                                                                                              | Animal studies  | 16         |

|   | Search history                                                                                    | Facet                                         | Hits  |
|---|---------------------------------------------------------------------------------------------------|-----------------------------------------------|-------|
| 6 | #4 AND ([conference review]/lim OR [editorial]/lim OR [letter]/lim OR [note]/lim OR [review]/lim) | Review/editorial                              | 1,042 |
| 7 | #5 OR #6                                                                                          | Animal studies and reviews                    | 1,058 |
| 8 | #4 NOT #7                                                                                         | Evidence excluding animal studies and reviews | 1,543 |

**Database searched:** Cochrane Central Register of Controlled Trials (CENTRAL) on 17 June 2016 (without dupilumab).

|   | Search history                                                                                                                                                                                                                                                                                                                                                                                             | Facet             | Hits   |
|---|------------------------------------------------------------------------------------------------------------------------------------------------------------------------------------------------------------------------------------------------------------------------------------------------------------------------------------------------------------------------------------------------------------|-------------------|--------|
| 1 | MeSH descriptor: [Asthma] explode all trees                                                                                                                                                                                                                                                                                                                                                                | Disease           | 9,789  |
| 2 | “asthma” or “severe asthma” or “uncontrolled asthma” or “severe persistent asthma” or “inadequately controlled asthma” or “poorly controlled asthma” or “severe allergic asthma” or “asthma bronchiale” or “asthma, bronchial” or “asthmatic” or “asthmatic subject” or “bronchial asthma” or “bronchus asthma” or “childhood asthma” or “chronic asthma” or “lung allergy” or “moderate to severe asthma” |                   | 21,009 |
| 3 | asthma* near/4 (severe or uncontrol* or persistent)                                                                                                                                                                                                                                                                                                                                                        |                   | 3,978  |
| 4 | #1 OR #2 OR #3                                                                                                                                                                                                                                                                                                                                                                                             |                   | 27,030 |
| 5 | “biologic agent” OR “omalizumab” OR “hu 901” OR “hu901” OR “monoclonal antibody e 25” OR “monoclonal antibody e25” OR “olizumab” OR “xolair” OR “mepolizumab” OR “bosatria” OR “nucala” OR “sb 240563” OR “sb-240563” OR “sb240563” OR “reslizumab” OR “sch 55700” OR “sch55700” OR “benralizumab” OR “medi 563” OR “medi563” OR CINQAIR OR CINQAERO                                                       | Intervention      | 687    |
| 6 | #4 AND #5                                                                                                                                                                                                                                                                                                                                                                                                  | Combined          | 496    |
| 7 | #6 in Trials (word variations were searched)                                                                                                                                                                                                                                                                                                                                                               | Limited to trials | 441    |

**Database searched:** MEDLINE® In-Process (<https://www.ncbi.nlm.nih.gov/pubmed>) on 17 June 2016 (without dupilumab).

|   | Search history                                                                                                                                                                                                                                                                                                                                                                                                                                                  | Facet             | Hits    |
|---|-----------------------------------------------------------------------------------------------------------------------------------------------------------------------------------------------------------------------------------------------------------------------------------------------------------------------------------------------------------------------------------------------------------------------------------------------------------------|-------------------|---------|
| 1 | Asthma OR “severe asthma” OR “uncontrolled asthma” OR “severe persistent asthma” OR “inadequately controlled asthma” OR “poorly controlled asthma” OR “severe allergic asthma” OR “asthma bronchiale” OR “asthma, bronchial” OR “asthmatic” OR “asthmatic subject” OR “bronchial asthma” OR “bronchus asthma” OR “childhood asthma” OR “chronic asthma” OR “lung allergy” OR asthma* near/4 (severe or uncontrol* or persistent) OR “moderate to severe asthma” | Disease           | 160,619 |
| 2 | “biologic agent” OR “omalizumab” OR “hu 901” OR “hu901” OR “monoclonal antibody e 25” OR “monoclonal antibody e25” OR “olizumab” OR “xolair” OR “mepolizumab” OR “bosatria” OR “nucala” OR “sb 240563” OR “sb-240563” OR “sb240563” OR “reslizumab” OR “sch 55700” OR “sch55700” OR “benralizumab” OR “medi 563” OR “medi563” OR CINQAIR OR CINQAERO                                                                                                            | Intervention      | 2,196   |
| 3 | #1 AND #2                                                                                                                                                                                                                                                                                                                                                                                                                                                       | Combined          | 1,153   |
| 4 | #3 AND (inprocess[sb] OR pubstatusaheadofprint)                                                                                                                                                                                                                                                                                                                                                                                                                 | Trials in process | 91      |

**Database searched:** Embase<sup>®</sup> and MEDLINE<sup>®</sup> (Embase.com) on 03 August 2016 (with dupilumab).

|   | Search history                                                                                                                                                                                                                                                                                                                        | Facet   | Hits    |
|---|---------------------------------------------------------------------------------------------------------------------------------------------------------------------------------------------------------------------------------------------------------------------------------------------------------------------------------------|---------|---------|
| 1 | ‘asthma’/syn OR ‘asthma/de’ OR ‘severe persistent asthma’/syn OR ‘asthma bronchiale’ OR ‘asthma, bronchial’ OR ‘asthmatic’ OR ‘asthmatic subject’ OR ‘bronchial asthma’ OR ‘bronchus asthma’ OR ‘childhood asthma’ OR ‘chronic asthma’ OR ‘lung allergy’ OR ‘inadequately controlled asthma’ OR asthma* NEAR/4 (severe OR uncontrol*) | Disease | 262,689 |



|   | Search history                                                                                                                                                                                                                                                                                                                                                                                                                                                                                                                                                                                                                                                                                                                                                                                                                                                                                                                                                                                                                                                                                                                                                                                                                                                                                                                                                                                                                                            | Facet                                         | Hits       |
|---|-----------------------------------------------------------------------------------------------------------------------------------------------------------------------------------------------------------------------------------------------------------------------------------------------------------------------------------------------------------------------------------------------------------------------------------------------------------------------------------------------------------------------------------------------------------------------------------------------------------------------------------------------------------------------------------------------------------------------------------------------------------------------------------------------------------------------------------------------------------------------------------------------------------------------------------------------------------------------------------------------------------------------------------------------------------------------------------------------------------------------------------------------------------------------------------------------------------------------------------------------------------------------------------------------------------------------------------------------------------------------------------------------------------------------------------------------------------|-----------------------------------------------|------------|
| 2 | 'prospective study'/exp OR 'randomization'/de OR 'controlled study'/de OR 'single blind procedure'/de OR 'double blind procedure'/de OR 'crossover procedure'/de OR 'placebo'/de OR 'clinical trial' OR 'clinical trials' OR 'controlled clinical trial' OR 'controlled clinical trials' OR 'randomised controlled trial' OR 'randomized controlled trial' OR 'randomised controlled trials' OR 'randomized controlled trials' OR 'randomisation' OR 'randomization' OR random* OR rct OR 'random allocation' OR 'random assignment' OR 'randomly allocated' OR 'randomly assigned' OR 'allocated randomly' OR 'assigned randomly' OR allocated NEAR/2 random OR assign* NEAR/2 random* OR randomi* OR (single OR double OR triple OR treble) NEAR/1 (blind* OR mask*) OR placebo* OR 'prospective study'/de OR nrct OR 'n rct' OR n?rct OR non NEAR/2 random* OR 'controlled clinical trial'/exp OR 'intervention study'/exp OR (clinical NEXT/1 trial*):ab,ti OR 'major clinical study'/exp OR compar*:ab,ti OR group*:ab,ti OR 'cohort analysis'/exp OR 'longitudinal study'/exp OR 'retrospective study'/exp OR 'follow up'/exp OR cohort*:ab,ti OR (('follow up' OR followup) NEXT/1 (study OR studies)):ab,ti OR 'open study'/exp OR (case* NEXT/1 control*):ab,ti OR 'clinical trial'/exp OR 'clinical article'/exp OR 'survival'/exp OR 'case control study'/exp OR NOT ('letter'/de OR 'abstract report'/de OR 'case report' OR 'case study'/de) | Study design                                  | 12,682,199 |
| 3 | 'dupilumab'/syn OR 'regn 668' OR 'regn668' OR 'sar 231893' OR 'sar231893'                                                                                                                                                                                                                                                                                                                                                                                                                                                                                                                                                                                                                                                                                                                                                                                                                                                                                                                                                                                                                                                                                                                                                                                                                                                                                                                                                                                 | Interventions                                 | 200        |
| 4 | #1 AND #2 AND #3                                                                                                                                                                                                                                                                                                                                                                                                                                                                                                                                                                                                                                                                                                                                                                                                                                                                                                                                                                                                                                                                                                                                                                                                                                                                                                                                                                                                                                          | Combined search                               | 112        |
| 5 | #4 AND [animals]/lim NOT ([humans]/lim AND [animals]/lim)                                                                                                                                                                                                                                                                                                                                                                                                                                                                                                                                                                                                                                                                                                                                                                                                                                                                                                                                                                                                                                                                                                                                                                                                                                                                                                                                                                                                 | Animal studies                                | 0          |
| 6 | #4 AND ([conference review]/lim OR [editorial]/lim OR [letter]/lim OR [note]/lim OR [review]/lim)                                                                                                                                                                                                                                                                                                                                                                                                                                                                                                                                                                                                                                                                                                                                                                                                                                                                                                                                                                                                                                                                                                                                                                                                                                                                                                                                                         | Review/editorial                              | 57         |
| 7 | #5 OR #6                                                                                                                                                                                                                                                                                                                                                                                                                                                                                                                                                                                                                                                                                                                                                                                                                                                                                                                                                                                                                                                                                                                                                                                                                                                                                                                                                                                                                                                  | Animal studies and reviews                    | 57         |
| 8 | #4 NOT #7                                                                                                                                                                                                                                                                                                                                                                                                                                                                                                                                                                                                                                                                                                                                                                                                                                                                                                                                                                                                                                                                                                                                                                                                                                                                                                                                                                                                                                                 | Evidence excluding animal studies and reviews | 55         |

**Database searched:** Cochrane Central Register of Controlled Trials (CENTRAL) on 03 August 2016 (with dupilumab).

|   | Search history                              | Facet   | Hits  |
|---|---------------------------------------------|---------|-------|
| 1 | MeSH descriptor: [Asthma] explode all trees | Disease | 9,866 |

|   | Search history                                                                                                                                                                                                                                                                                                                                                                                             | Facet             | Hits   |
|---|------------------------------------------------------------------------------------------------------------------------------------------------------------------------------------------------------------------------------------------------------------------------------------------------------------------------------------------------------------------------------------------------------------|-------------------|--------|
| 2 | “asthma” or “severe asthma” or “uncontrolled asthma” or “severe persistent asthma” or “inadequately controlled asthma” or “poorly controlled asthma” or “severe allergic asthma” or “asthma bronchiale” or “asthma, bronchial” or “asthmatic” or “asthmatic subject” or “bronchial asthma” or “bronchus asthma” or “childhood asthma” or “chronic asthma” or “lung allergy” or “moderate to severe asthma” |                   | 27,303 |
| 3 | asthma* near/4 (severe or uncontrol* or persistent)                                                                                                                                                                                                                                                                                                                                                        |                   | 4,056  |
| 4 | #1 OR #2 OR #3                                                                                                                                                                                                                                                                                                                                                                                             |                   | 27,323 |
| 5 | ‘dupilumab’/syn OR ‘regn 668’ OR ‘regn668’ OR ‘sar 231893’ OR ‘sar231893’                                                                                                                                                                                                                                                                                                                                  | Intervention      | 36     |
| 6 | #4 AND #5                                                                                                                                                                                                                                                                                                                                                                                                  | Combined          | 21     |
| 7 | #6 in Trials (word variations were searched)                                                                                                                                                                                                                                                                                                                                                               | Limited to trials | 21     |

**Database searched:** MEDLINE® In-Process (<https://www.ncbi.nlm.nih.gov/pubmed>) on 03 August 2016 (with dupilumab).

|   | Search history                                                                                                                                                                                                                                                                                                                                                                                                                                                  | Facet             | Hits    |
|---|-----------------------------------------------------------------------------------------------------------------------------------------------------------------------------------------------------------------------------------------------------------------------------------------------------------------------------------------------------------------------------------------------------------------------------------------------------------------|-------------------|---------|
| 1 | Asthma OR “severe asthma” OR “uncontrolled asthma” OR “severe persistent asthma” OR “inadequately controlled asthma” OR “poorly controlled asthma” OR “severe allergic asthma” OR “asthma bronchiale” OR “asthma, bronchial” OR “asthmatic” OR “asthmatic subject” OR “bronchial asthma” OR “bronchus asthma” OR “childhood asthma” OR “chronic asthma” OR “lung allergy” OR asthma* near/4 (severe or uncontrol* or persistent) OR “moderate to severe asthma” | Disease           | 161,773 |
| 2 | ‘dupilumab’/syn OR ‘regn 668’ OR ‘regn668’ OR ‘sar 231893’ OR ‘sar231893’                                                                                                                                                                                                                                                                                                                                                                                       | Intervention      | 55      |
| 3 | #1 AND #2                                                                                                                                                                                                                                                                                                                                                                                                                                                       | Combined          | 32      |
| 4 | #3 AND (inprocess[sb] OR pubstatusaheadofprint)                                                                                                                                                                                                                                                                                                                                                                                                                 | Trials in process | 8       |

**Table S2. Eligibility criteria applied to the search results**

| <b>Eligibility criteria</b> |                                                                                                                                                                                                                                                                                                                                                                                                                                                                                                                                                                                                                                                                                                                                                                                                                                                                      |
|-----------------------------|----------------------------------------------------------------------------------------------------------------------------------------------------------------------------------------------------------------------------------------------------------------------------------------------------------------------------------------------------------------------------------------------------------------------------------------------------------------------------------------------------------------------------------------------------------------------------------------------------------------------------------------------------------------------------------------------------------------------------------------------------------------------------------------------------------------------------------------------------------------------|
| Patient population          | <p>Age: adults (<math>\geq 18</math> years) and adolescents (<math>\geq 12</math>–18 years)</p> <p>Sex: any</p> <p>Race: any</p> <p>Disease: severe asthma that is uncontrolled despite treatment with medium- to high-dosage ICS plus <math>\geq 1</math> additional controller</p>                                                                                                                                                                                                                                                                                                                                                                                                                                                                                                                                                                                 |
| Interventions               | <p>Biologics (approved and in development):</p> <ul style="list-style-type: none"> <li>Benralizumab</li> <li>Mepolizumab</li> <li>Omalizumab</li> <li>Reslizumab</li> <li>Dupilumab</li> </ul>                                                                                                                                                                                                                                                                                                                                                                                                                                                                                                                                                                                                                                                                       |
| Treatment comparators       | <p>Placebo/best supportive care</p> <p>Medium- or high-dosage ICS plus <math>\geq 1</math> additional controller</p> <p>Medium-dosage ICS plus 1 additional controller (e.g., LABA/LTRA/LAMA/theophylline)</p> <p>High-dosage ICS plus 1 additional controller (e.g., LABA/LTRA/LAMA/theophylline)</p> <p>High-dosage ICS plus 2 additional controllers (e.g., LABA+LAMA/LABA+LTRA)</p> <p>High-dosage ICS plus <math>\geq 1</math> additional asthma controller + OCS maintenance treatment</p>                                                                                                                                                                                                                                                                                                                                                                     |
| Outcomes of interest        | <p>Efficacy and quality-of-life outcomes:</p> <ul style="list-style-type: none"> <li>Prebronchodilator FEV<sub>1</sub></li> <li>Postbronchodilator FEV<sub>1</sub></li> <li>Peak expiratory flow</li> <li>Asthma exacerbation (overall exacerbation, exacerbations requiring systemic CS, ER visit and/or hospitalisation)</li> <li>Definition of exacerbation</li> <li>Number of patients with exacerbations</li> <li>Total number of exacerbations experienced over the duration of the study</li> <li>Mean rate of exacerbations per patient per year</li> <li>Time to first exacerbation</li> <li>Symptom-free days</li> <li>Asthma control measured by ACQ</li> <li>Asthma symptoms (overall, daytime, night-time symptom, night-time awakening)</li> <li>OCS-sparing efficacy</li> <li>AQLQ or mini-AQLQ</li> <li>SGRQ</li> <li>EQ-5D</li> <li>WPAI</li> </ul> |

|                       |                                                                                                                                                                                                                                                                                                                                    |
|-----------------------|------------------------------------------------------------------------------------------------------------------------------------------------------------------------------------------------------------------------------------------------------------------------------------------------------------------------------------|
|                       | Safety outcomes:<br>Any adverse events<br>Any serious adverse events<br>Any treatment-related adverse events<br>Bronchitis<br>Cardiac events<br>Cough<br>Dry mouth<br>Hoarseness or dysphonia<br>Mortality<br>Nausea<br>Oral candidiasis<br>Pneumonia<br>Palpitations<br>Sinusitis<br>Tremor<br>Upper respiratory tract infections |
|                       | Tolerability:<br>All withdrawals<br>Withdrawal due to adverse events<br>Withdrawal due to lack of efficacy                                                                                                                                                                                                                         |
| Study designs         | RCTs                                                                                                                                                                                                                                                                                                                               |
| Language              | Database to be searched irrespective of language<br>English language studies were included in systematic review                                                                                                                                                                                                                    |
| Publication timeframe | Database inception to present date (searched on 3 August 2016)<br>Conference proceedings for past 3 years (searched on 18 July 2016)                                                                                                                                                                                               |

ACQ, Asthma Control Questionnaire; AQLQ, Asthma Quality of Life Questionnaire; CS, corticosteroid; ER, emergency room; EQ-5D, EuroQOL 5D; FEV<sub>1</sub>, forced expiratory volume in 1 second; ICS, inhaled corticosteroid; LABA, long-acting  $\beta_2$ -agonist; LAMA, long-acting muscarinic antagonist; LTRA, leukotriene receptor antagonist; OCS, oral corticosteroid; RCT, randomised controlled trial; SGRQ, St. George's Respiratory Questionnaire; WPAI, Work Productivity and Activity Impairment.

**Figure S1. Methods for conducting the systematic review**

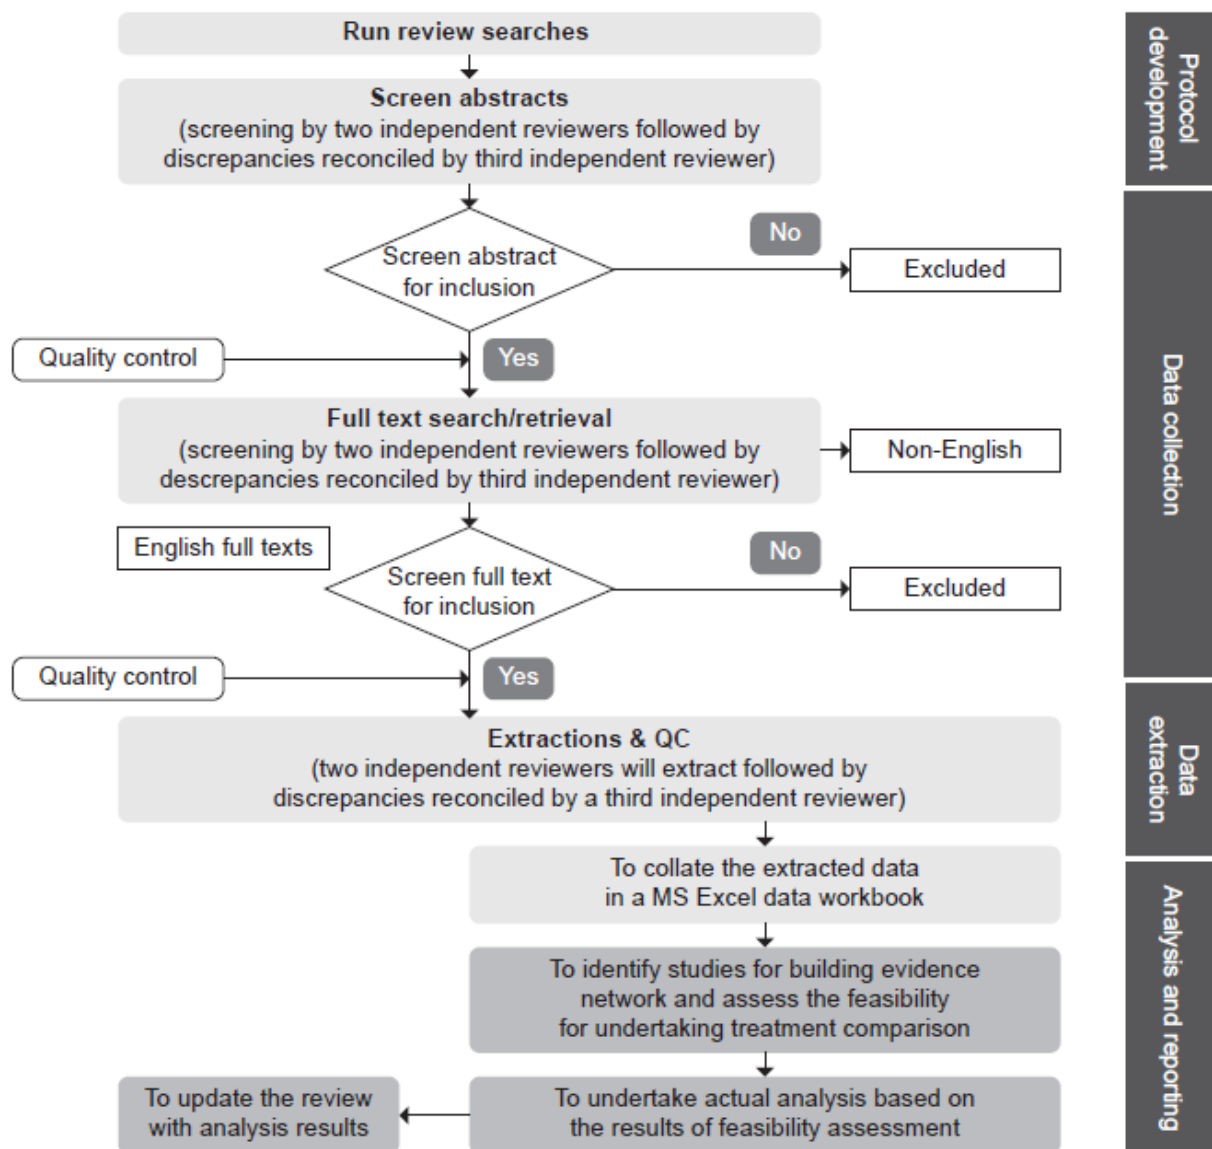

MS, Microsoft; QC, quality check.

**Figure S2. Anchored methods for population-adjusted indirect comparisons**

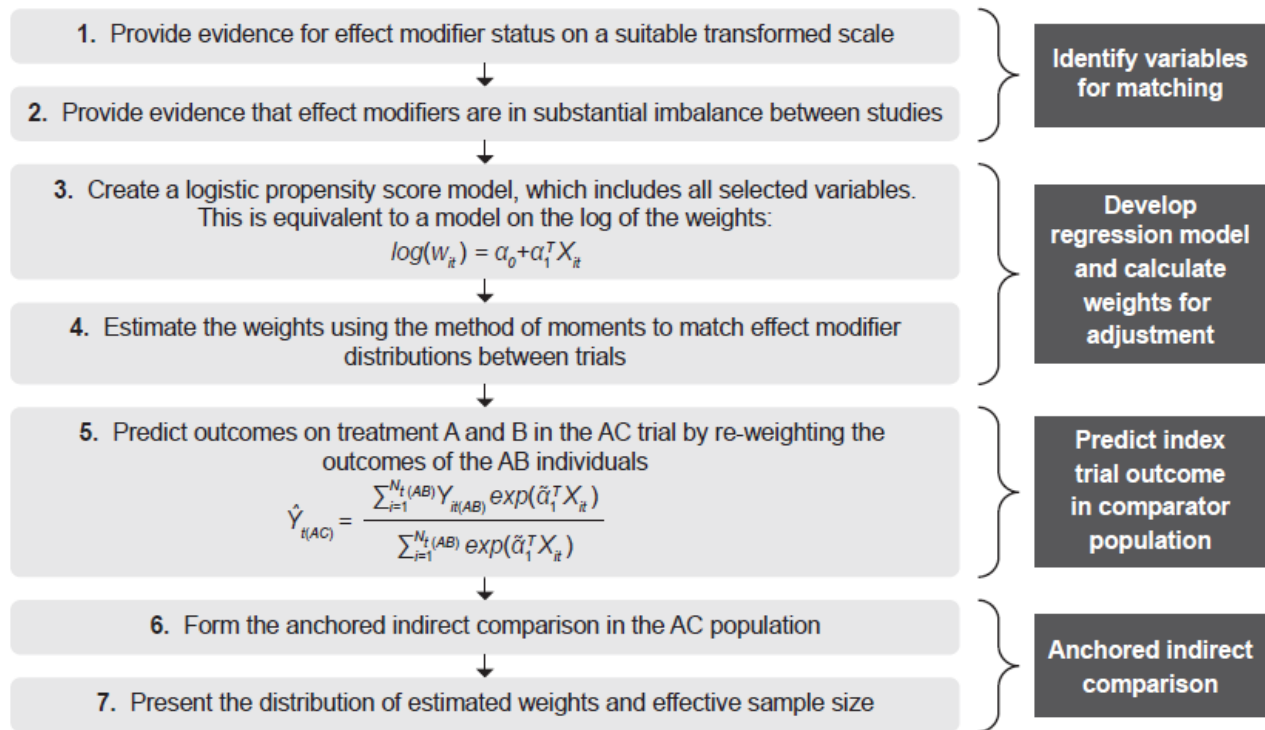

## **APPENDIX 2: RESULTS**

### **Systematic Review**

The database search identified 2,159 references (**Table S2; Figure 1**). Of these, 314 were removed as duplicates and 1,532 were excluded after an initial screen based on title and abstract. The remaining 313 references were evaluated as full-text articles. Of these, 144 references met the inclusion criteria for this review. A search of conference proceedings, bibliographies, and clinical trial registries identified an additional 45 articles. Thus, 189 references representing 32 clinical studies were identified by the systematic review (**Table S3**). Studies of omalizumab and dupilumab were removed. Fifteen studies remained; six evaluated benralizumab, five evaluated mepolizumab, and four evaluated reslizumab as add-on therapy for patients with severe, uncontrolled asthma.

### **Analysis of Placebo Event Rate Before and After Matching**

Matching adjustment may change the size of the placebo effect in the adjusted data set. We evaluated the placebo effect before and after matching as one way to assess performance of the adjustment process. The placebo group exacerbation event rate was greater in MENSA/DREAM (pooled aggregate exacerbation rate=2.0) than in SIROCCO/CALIMA (pooled exacerbation rate=1.27 [95% confidence interval {CI}: 1.19–1.36]). The matching adjustment increased the placebo group's annual exacerbation event rate in SIROCCO/CALIMA from 1.27 to 1.63 (95% CI: 1.52–1.75), making it closer to the aggregate pooled annual exacerbation event rate of 2.0 for the placebo group in MENSA/DREAM.

## **Benralizumab vs. Mepolizumab: Sensitivity Analysis Including MUSCA**

### *Baseline characteristics and effective sample size*

The benralizumab SIROCCO/CALIMA baseline characteristics were well matched to the mepolizumab trial population following adjustment for the mepolizumab MENSA/DREAM/MUSCA population characteristics (**Table S6**). As a result of matching, the effective sample size (ESS) of the benralizumab population decreased from 959 to 770, which was considered adequate for robust MAIC analyses.

### *Annual rate of clinically significant exacerbations*

Benralizumab treatment reduced the annual rate of clinically significant exacerbations vs. placebo by 46% (rate ratio [RR]=0.54) in SIROCCO/CALIMA before matching adjustment and by 49% (RR=0.51) after matching adjustment to the mepolizumab patient population (**Table S8**). Mepolizumab reduced the exacerbation rate in MENSA/DREAM/MUSCA by 52% (RR=0.48) vs. placebo.

Indirect comparison of benralizumab vs. mepolizumab indicated that the treatments were not statistically significantly different in their effects on exacerbations either before (RR=1.2, 95% CI: 0.92–1.36) or after (RR=1.05, 95% CI: 0.86–1.29) matching adjustment.

### *Annual rate of asthma exacerbations resulting in emergency department visit or hospitalisation*

Benralizumab treatment reduced the rate of clinically significant exacerbations leading to emergency department (ED) visit/hospitalisation vs. placebo by 34% (RR=0.66) for patients in SIROCCO/CALIMA before matching adjustment to the mepolizumab patient population and by



45% (RR=0.55) after matching adjustment (**Table S7**). Mepolizumab reduced the exacerbation rate for patients in MENSA/DREAM by 55% (RR=0.45) vs. placebo.

Indirect comparison of benralizumab vs. mepolizumab after matching adjustment indicated comparable efficacy of benralizumab and mepolizumab for reducing exacerbations requiring ED visit or hospitalisation both before (RR=1.47, 95% CI: 0.86–2.49) and after (RR=1.22, 95% CI: 0.71–2.10) matching adjustment.

*Prebronchodilator forced expiratory volume in 1 second*

Before and after matching, benralizumab and mepolizumab demonstrated similar improvements in prebronchodilator FEV<sub>1</sub> from baseline to Week 24 (**Table S7**). Indirect comparison demonstrated comparable improvement in FEV<sub>1</sub> for benralizumab and mepolizumab before (RR=0.50, 95% CI: –0.05–0.10) and after (RR=0.61, 95% CI: –0.06–0.10) matching.

**Table S3. Studies of IL-5–targeted treatments included by the systematic review**

Benralizumab

| Study                            | Study phase | Sample size | Interventions                                                                      | Primary results publication   |
|----------------------------------|-------------|-------------|------------------------------------------------------------------------------------|-------------------------------|
| SIROCCO study<br>NCT01928771 [2] | III         | 1,205       | Benralizumab 30 mg SC Q4W<br>Benralizumab 30 mg SC Q8W <sup>a</sup><br>Placebo     | Bleecker, et al. (2016) [3]   |
| CALIMA study<br>NCT01914757 [4]  | III         | 1,306       | Benralizumab 30 mg SC Q4W<br>Benralizumab 30 mg SC Q8W <sup>a</sup><br>Placebo     | Fitzgerald, et al. (2016) [5] |
| ZONDA study<br>NCT02075255 [6]   | III         | 220         | Benralizumab 30 mg SC Q4W<br>Benralizumab 30 mg SC Q8W <sup>a</sup><br>Placebo     | Nair, et al. (2017) [7]       |
| NCT01238861 [8]                  | II          | 609         | Benralizumab 2 mg SC<br>Benralizumab 20 mg SC<br>Benralizumab 100 mg SC<br>Placebo | Castro, et al. (2014) [9]     |
| NCT01412736 [10]                 | II          | 106         | Benralizumab 2 mg SC<br>Benralizumab 20 mg SC<br>Benralizumab 100 mg SC<br>Placebo | Park, et al. (2016) [11]      |
| NCT01947946 [12]                 | III         | 13          | Benralizumab 30 mg Q4W<br>Benralizumab 30 mg Q8W<br>Placebo                        |                               |
| NCT00768079 [13]                 | II          | 110         | Benralizumab 0.3 mg/kg IV<br>Benralizumab 1 mg/kg IV<br>Placebo                    | Nowak, et al. (2015) [14]     |

## Mepolizumab

| Study                            | Study phase | Sample size | Interventions                                                                     | Primary results publication |
|----------------------------------|-------------|-------------|-----------------------------------------------------------------------------------|-----------------------------|
| MENSA study<br>NCT01691521 [15]  | III         | 580         | Mepolizumab 100 mg SC<br>Mepolizumab 75 mg IV<br>Placebo                          | Ortega, et al. (2014) [16]  |
| DREAM study<br>NCT01000506 [17]  | IIb/III     | 621         | Mepolizumab 75 mg IV<br>Mepolizumab 250 mg IV<br>Mepolizumab 750 mg IV<br>Placebo | Pavord, et al. (2012) [18]  |
| SIRIUS study<br>NCT01691508 [19] | III         | 135         | Mepolizumab 100 mg SC<br>Placebo                                                  | Bel, et al. (2014) [20]     |
| ISRCTN75169762 [21]              | II          | 61          | Mepolizumab 750 mg<br>Placebo                                                     | Haldar, et al. (2009) [22]  |
| NCT00292877 [23]                 | II          | 20          | Mepolizumab 750 mg<br>Placebo                                                     | Nair, et al. (2009) [24]    |

## Reslizumab

| Study                          | Study phase | Sample size | Interventions                 | Primary results publication |
|--------------------------------|-------------|-------------|-------------------------------|-----------------------------|
| Study 3082<br>NCT01287039 [25] | III         | 489         | Reslizumab 3 mg/kg<br>Placebo | Castro, et al. (2015) [26]  |
| Study 3083<br>NCT01285323 [27] | III         | 464         | Reslizumab 3 mg/kg<br>Placebo | Castro, et al. (2015) [26]  |
| NCT00587288 [28]               | II          | 106         | Reslizumab 3 mg/kg<br>Placebo | Castro, et al. (2011) [29]  |

<sup>a</sup>First three doses given Q4W.

IL, interleukin; IV, intravenously; Q4W, every 4 weeks; Q8W, every 8 weeks; SC, subcutaneously.

**Table S4. Summary of study characteristics of benralizumab, mepolizumab, and reslizumab studies**

| Study characteristics          | Benralizumab                                                                                                                                                                                                             |                                                                                                                                                                                                                          | Mepolizumab                                                                                    |                                                                                                | Reslizumab                                                                                                                                                                                                   |                                                                                                                                                                                                              |
|--------------------------------|--------------------------------------------------------------------------------------------------------------------------------------------------------------------------------------------------------------------------|--------------------------------------------------------------------------------------------------------------------------------------------------------------------------------------------------------------------------|------------------------------------------------------------------------------------------------|------------------------------------------------------------------------------------------------|--------------------------------------------------------------------------------------------------------------------------------------------------------------------------------------------------------------|--------------------------------------------------------------------------------------------------------------------------------------------------------------------------------------------------------------|
|                                | SIROCCO [3]                                                                                                                                                                                                              | CALIMA [5]                                                                                                                                                                                                               | MENSA [16]                                                                                     | DREAM [18]                                                                                     | Study 3082 [26]                                                                                                                                                                                              | Study 3083 [26]                                                                                                                                                                                              |
| <b>Publication type</b>        | Journal and CSR                                                                                                                                                                                                          | Journal and CSR                                                                                                                                                                                                          | Journal and CSR                                                                                | Journal and CSR                                                                                | Journal                                                                                                                                                                                                      | Journal                                                                                                                                                                                                      |
| <b>Interventions</b>           | Benralizumab 30 mg Q4W SC                                                                                                                                                                                                | Benralizumab 30 mg Q4W SC                                                                                                                                                                                                | Mepolizumab 75 mg Q4W IV                                                                       | Mepolizumab 75 mg Q4W IV                                                                       | Reslizumab 3.0 mg/kg IV                                                                                                                                                                                      | Reslizumab 3.0 mg/kg IV                                                                                                                                                                                      |
|                                | Benralizumab 30 mg Q8W SC                                                                                                                                                                                                | Benralizumab 30 mg Q8W SC                                                                                                                                                                                                | Mepolizumab 100 mg Q4W SC                                                                      | Mepolizumab 250 mg Q4W IV                                                                      | Placebo                                                                                                                                                                                                      | Placebo                                                                                                                                                                                                      |
|                                | Placebo                                                                                                                                                                                                                  | Placebo                                                                                                                                                                                                                  | Placebo                                                                                        | Mepolizumab 750 mg Q4W IV                                                                      | -                                                                                                                                                                                                            | -                                                                                                                                                                                                            |
|                                | -                                                                                                                                                                                                                        | -                                                                                                                                                                                                                        | -                                                                                              | Placebo                                                                                        | -                                                                                                                                                                                                            | -                                                                                                                                                                                                            |
| <b>Phase</b>                   | III                                                                                                                                                                                                                      | III                                                                                                                                                                                                                      | III                                                                                            | IIb                                                                                            | III                                                                                                                                                                                                          | III                                                                                                                                                                                                          |
| <b>Sample size</b>             | 1205 (805) <sup>a</sup>                                                                                                                                                                                                  | 1306 (734) <sup>a</sup>                                                                                                                                                                                                  | 580                                                                                            | 308                                                                                            | 489                                                                                                                                                                                                          | 464                                                                                                                                                                                                          |
| <b>Method of randomisation</b> | Adequate                                                                                                                                                                                                                 | Adequate                                                                                                                                                                                                                 | Adequate                                                                                       | Adequate                                                                                       | Adequate                                                                                                                                                                                                     | Adequate                                                                                                                                                                                                     |
| <b>Blinding status</b>         | Double-blind                                                                                                                                                                                                             | Double-blind                                                                                                                                                                                                             | Double-blind                                                                                   | Double-blind                                                                                   | Double-blind                                                                                                                                                                                                 | Double-blind                                                                                                                                                                                                 |
| <b>Treatment duration</b>      | 48 weeks                                                                                                                                                                                                                 | 56 weeks                                                                                                                                                                                                                 | 32 weeks                                                                                       | 52 weeks                                                                                       | 52 weeks                                                                                                                                                                                                     | 52 weeks                                                                                                                                                                                                     |
| <b>Primary outcome</b>         | <ul style="list-style-type: none"> <li>Annual rate ratio of asthma exacerbations for patients receiving high-dose ICS + LABA vs placebo with baseline blood EOS <math>\geq 300</math> cells/<math>\mu</math>L</li> </ul> | <ul style="list-style-type: none"> <li>Annual rate ratio of asthma exacerbations for patients receiving high-dose ICS + LABA vs placebo with baseline blood EOS <math>\geq 300</math> cells/<math>\mu</math>L</li> </ul> | <ul style="list-style-type: none"> <li>Rate of clinically significant exacerbations</li> </ul> | <ul style="list-style-type: none"> <li>Rate of clinically significant exacerbations</li> </ul> | <ul style="list-style-type: none"> <li>The frequency of clinical asthma exacerbations per patient during the 52 week treatment period, with events adjudicated by an independent review committee</li> </ul> | <ul style="list-style-type: none"> <li>The frequency of clinical asthma exacerbations per patient during the 52 week treatment period, with events adjudicated by an independent review committee</li> </ul> |

The highlighted cells indicate differences across the trials.

\*Number in parenthesis represents patients for benralizumab Q8W and placebo arms.

CSR, Clinical Study Report; EOS, eosinophils; ICS:, inhaled corticosteroids; IV, intravenous; LABA, Long-acting beta-2 agonist; Q4W, every four weeks; Q8W, every eight weeks; SC, subcutaneous;

**Table S5. Comparison of baseline characteristics of patients before and after matching for the analysis of prebronchodilator FEV<sub>1</sub> change from baseline to the end of each study**

| Baseline characteristics             | SIROCCO/CALIMA <sup>a</sup><br>(before adjustment) | MENSA/DREAM<br>(aggregate reported data)                            | SIROCCO/CALIMA<br>(after adjustment for MENSA/DREAM)         |
|--------------------------------------|----------------------------------------------------|---------------------------------------------------------------------|--------------------------------------------------------------|
|                                      | Benralizumab Q8W,<br>placebo<br>N=838              | Mepolizumab 75 mg<br>IV, mepolizumab 100<br>mg SC, placebo<br>N=884 | Benralizumab Q8W,<br>placebo<br>Effective sample<br>size=540 |
| Eosinophil count, %                  |                                                    |                                                                     |                                                              |
| ≥300 cells/μL                        | 67.66                                              | 52.45                                                               | 52.72                                                        |
| <300 cells/μL                        | 32.34                                              | 47.55                                                               | 47.28                                                        |
| Maintenance OCS use,<br>%            |                                                    |                                                                     |                                                              |
| Yes                                  | 14.68                                              | 26.58 <sup>b</sup>                                                  | 29.83                                                        |
| No                                   | 85.32                                              | 73.42 <sup>b</sup>                                                  | 70.17                                                        |
| IgE count, %                         |                                                    |                                                                     |                                                              |
| ≤30 IU/mL                            | 11.00                                              | 13.29                                                               | 14.15                                                        |
| >30–≤700 IU/mL                       | 71.34                                              | 70.35                                                               | 70.39                                                        |
| >700 IU/mL                           | 17.65                                              | 16.35                                                               | 15.45                                                        |
| Sex, %                               |                                                    |                                                                     |                                                              |
| Male                                 | 36.99                                              | 40.05                                                               | 39.25                                                        |
| Female                               | 63.01                                              | 59.95                                                               | 60.75                                                        |
| Exacerbations in<br>previous year, % |                                                    |                                                                     |                                                              |
| 2                                    | 62.65                                              | 42.99                                                               | 43.2                                                         |
| >2                                   | 37.35                                              | 56.79                                                               | 56.8                                                         |
| Nasal polyps, %                      |                                                    |                                                                     |                                                              |
| No                                   | 80.79                                              | 86.83                                                               | 82.99                                                        |
| Yes                                  | 19.21                                              | 13.17                                                               | 17.01                                                        |
| BMI, mean (SD)                       | 28.84 (6.32)                                       | 27.98 (5.912)                                                       | 28.36 (6.10)                                                 |

<sup>a</sup>Includes only patients receiving FP  $\geq 880$   $\mu\text{g/d}$ .

<sup>b</sup>Data are extracted from publications rather than clinical study reports.

BMI, body mass index; FEV<sub>1</sub>, forced expiratory volume in 1 second; FP, fluticasone propionate; ICS, inhaled corticosteroid; IgE, immunoglobulin E; IV, intravenous; OCS, oral corticosteroid; Q8W, every 8 weeks (first three doses every 4 weeks); SC, subcutaneous; SD, standard deviation.

**Table S6. Comparison of baseline characteristics of patients before and after matching for the analysis of prebronchodilator FEV<sub>1</sub> change from baseline to the end of each study (excluding MENSA trial)**

|                                      | SIROCCO/CALIMA <sup>a</sup><br>(before adjustment) | DREAM<br>(aggregate reported<br>data)     | SIROCCO/CALIMA<br>(after adjustment for<br>DREAM) |
|--------------------------------------|----------------------------------------------------|-------------------------------------------|---------------------------------------------------|
| Baseline characteristics             | Benralizumab Q8W,<br>placebo<br>N=838              | Mepolizumab 75 mg<br>IV, placebo<br>N=256 | Effective sample<br>size=402                      |
| Eosinophil count, %                  |                                                    |                                           |                                                   |
| ≥300 cells/μL                        | 67.66                                              | 41.88                                     | 40.56                                             |
| <300 cells/μL                        | 32.34                                              | 58.12                                     | 59.44                                             |
| Maintenance OCS use,<br>%            |                                                    |                                           |                                                   |
| Yes                                  | 14.68                                              | 30.84 <sup>b</sup>                        | 33.07                                             |
| No                                   | 85.32                                              | 69.16 <sup>b</sup>                        | 66.93                                             |
| IgE count, %                         |                                                    |                                           |                                                   |
| ≤30 IU/mL                            | 11.00                                              | 12.34                                     | 14.60                                             |
| >30–≤700 IU/mL                       | 71.34                                              | 70.45                                     | 70.8                                              |
| >700 IU/mL                           | 17.65                                              | 16.88                                     | 14.6                                              |
| Sex, %                               |                                                    |                                           |                                                   |
| Male                                 | 36.99                                              | 34.74                                     | 32.9                                              |
| Female                               | 63.01                                              | 65.26                                     | 67.1                                              |
| Exacerbations in<br>previous year, % |                                                    |                                           |                                                   |
| 2                                    | 62.65                                              | 43.83                                     | 44.38                                             |
| >2                                   | 37.35                                              | 55.84                                     | 55.62                                             |
| Nasal polyps, %                      |                                                    |                                           |                                                   |
| No                                   | 80.79                                              | 91.3                                      | 89.63                                             |
| Yes                                  | 19.21                                              | 8.7                                       | 10.37                                             |
| BMI, mean (SD)                       | 28.84 (6.32)                                       | 28.35 (6.05)                              | 29.12 (6.48)                                      |



<sup>a</sup>Includes only patients receiving FP  $\geq 880$   $\mu\text{g/d}$ .

<sup>b</sup>Data are extracted from publications rather than clinical study reports.

BMI, body mass index; FEV<sub>1</sub>, forced expiratory volume in 1 second; FP, fluticasone propionate; ICS, inhaled corticosteroid; IgE, immunoglobulin E; IV, intravenous; OCS, oral corticosteroid; Q8W, every 8 weeks (first three doses every 4 weeks); SC, subcutaneous; SD, standard deviation.

**Table S7. Benralizumab vs. mepolizumab analysis including MUSCA study: Baseline characteristics of patients before and after matching**

| Baseline characteristics                  | SIROCCO/CALIMA<br>(before adjustment) <sup>a</sup><br><br>Benralizumab Q8W,<br>placebo<br>N=959 | MENSA/DREAM/MUSCA<br>(aggregate reported data)<br><br>Mepolizumab 75 mg IV,<br>mepolizumab 100 mg SC,<br>placebo<br>N=1435 | SIROCCO/CALIMA<br>(after adjustment)<br><br>Benralizumab Q8W,<br>placebo<br>Effective sample<br>size=770 |
|-------------------------------------------|-------------------------------------------------------------------------------------------------|----------------------------------------------------------------------------------------------------------------------------|----------------------------------------------------------------------------------------------------------|
| Eosinophil count, %                       |                                                                                                 |                                                                                                                            |                                                                                                          |
| ≥300 cells/μL                             | 67.05                                                                                           | 54.28                                                                                                                      | 55.00                                                                                                    |
| <300 cells/μL                             | 32.95                                                                                           | 44.78                                                                                                                      | 45.00                                                                                                    |
| Maintenance oral<br>corticosteroid use, % |                                                                                                 |                                                                                                                            |                                                                                                          |
| Yes                                       | 15.22                                                                                           | 25.46 <sup>b</sup>                                                                                                         | 25.46                                                                                                    |
| No use                                    | 84.78                                                                                           | 75.53 <sup>b</sup>                                                                                                         | 75.53                                                                                                    |
| Sex, %                                    |                                                                                                 |                                                                                                                            |                                                                                                          |
| Male                                      | 36.60                                                                                           | 40.43                                                                                                                      | 40.43                                                                                                    |
| Female                                    | 63.40                                                                                           | 59.52                                                                                                                      | 59.52                                                                                                    |
| Exacerbations in the<br>previous year, %  |                                                                                                 |                                                                                                                            |                                                                                                          |
| 2                                         | 61.63                                                                                           | 51.23                                                                                                                      | 51.00                                                                                                    |
| >2                                        | 38.37                                                                                           | 48.48                                                                                                                      | 49.00                                                                                                    |
| Nasal polyps, %                           |                                                                                                 |                                                                                                                            |                                                                                                          |
| No                                        | 81.33                                                                                           | 84.38                                                                                                                      | 84.38                                                                                                    |
| Yes                                       | 18.67                                                                                           | 15.61                                                                                                                      | 15.61                                                                                                    |
| BMI, mean (SD)                            | 29.89 (6.27)                                                                                    | 28.06 (6.10)                                                                                                               | 28.06 (5.79)                                                                                             |

<sup>a</sup>Includes only patients receiving FP ≥880 μg/d.

<sup>b</sup>Data are extracted from publications rather than clinical study reports.

BMI, body mass index; FP, fluticasone propionate; IV, intravenous; Q8W, every 8 weeks (first three doses every 4 weeks); SC, subcutaneous; SD, standard deviation.

**Table S8. Benralizumab vs. mepolizumab analysis including MUSCA study: Matched and unmatched treatment comparisons of clinically significant asthma exacerbations and asthma exacerbations resulting in ED visit or hospitalisation, and change from baseline in prebronchodilator FEV<sub>1</sub>**

| Efficacy outcome                                                                | Treatment comparison                                                                       |                                                     |                                                                                 |
|---------------------------------------------------------------------------------|--------------------------------------------------------------------------------------------|-----------------------------------------------------|---------------------------------------------------------------------------------|
|                                                                                 | SIROCCO/CALIMA<br>Benralizumab Q8W vs.<br>placebo (no matching<br>adjustment) <sup>a</sup> | MENSA/DREAM/<br>MUSCA<br>Mepolizumab vs.<br>placebo | SIROCCO/CALIMA<br>Benralizumab Q8W<br>vs. placebo (with<br>matching adjustment) |
| Asthma exacerbations                                                            | RR (95% CI)                                                                                |                                                     |                                                                                 |
| Annualised rate of clinically<br>significant exacerbations                      | 0.54 (0.47–0.61)                                                                           | 0.48 (0.42–0.56)                                    | 0.51 (0.44–0.58)                                                                |
| Annualised rate of<br>exacerbations resulting in<br>ED visit or hospitalisation | 0.66 (0.46–0.94)                                                                           | 0.45 (0.30–0.66)                                    | 0.55 (0.37–0.79)                                                                |
| Change in prebronchodilator<br>FEV <sub>1</sub> , L                             | Mean (95% CI)                                                                              |                                                     |                                                                                 |
| From baseline to Week 24                                                        | 0.10 (0.04–0.17)                                                                           | 0.08 (0.03–0.12)                                    | 0.10 (0.03–0.16)                                                                |

<sup>a</sup>Includes only patients receiving FP ≥880 µg/d.

CI, confidence interval; ED, emergency department; FEV<sub>1</sub>, forced expiratory volume in 1 second; FP, fluticasone propionate; Q8W, every 8 weeks (first three doses every 4 weeks); RR, risk ratio.

**Figure S3. Evidence networks for comparisons of benralizumab with mepolizumab and reslizumab for patients with severe, uncontrolled asthma**

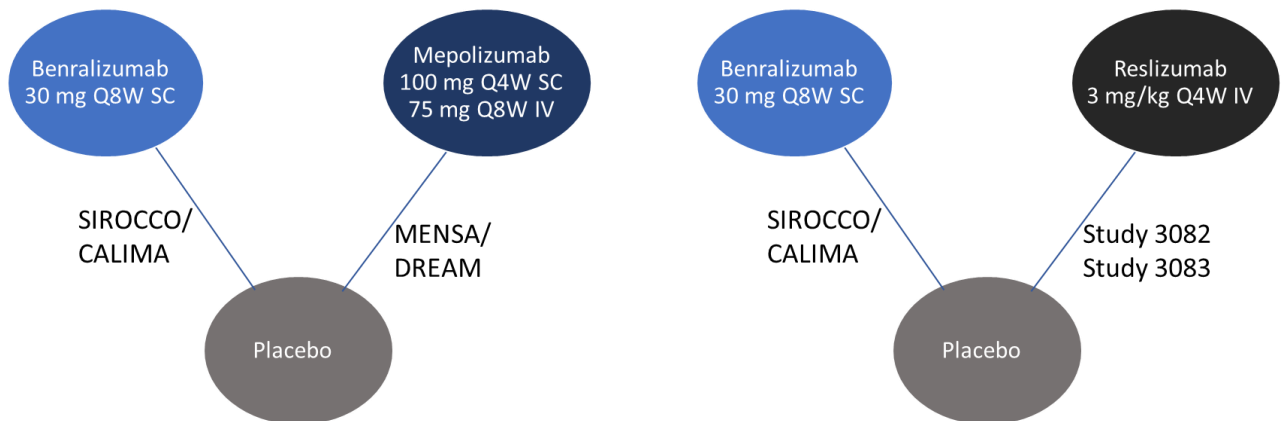

IV, intravenously; SC, subcutaneously; Q4W, every 4 weeks; Q8W, every 8 weeks (first three doses of benralizumab Q4W).

### APPENDIX 3: REFERENCES

1. Chupp GL, Bradford ES, Albers FC, *et al.* Efficacy of mepolizumab add-on therapy on health-related quality of life and markers of asthma control in severe eosinophilic asthma (MUSCA): a randomised, double-blind, placebo-controlled, parallel-group, multicentre, phase 3b trial. *Lancet Respir Med* 2017; 5: 390–400.
2. ClinicalTrials.gov. Efficacy and safety study of benralizumab added to high-dose inhaled corticosteroid plus LABA in patients with uncontrolled asthma (NCT01928771). <https://ClinicalTrials.gov/show/NCT01928771>. Date last updated: May 3 2017. Date last accessed: March 20 2018.
3. Bleecker ER, FitzGerald JM, Chanez P, *et al.* Efficacy and safety of benralizumab for patients with severe asthma uncontrolled with high-dosage inhaled corticosteroids and long-acting beta2-agonists (SIROCCO): a randomised, multicentre, placebo-controlled phase 3 trial. *Lancet* 2016; 388: 2115–2127.
4. ClinicalTrials.gov. Efficacy and safety study of benralizumab in adults and adolescents inadequately controlled on inhaled corticosteroid plus long-acting  $\beta$ 2 agonist (NCT01914757). <https://ClinicalTrials.gov/show/NCT01914757>. Date last updated: January 25 2017. Date last accessed: March 20 2018.
5. FitzGerald JM, Bleecker ER, Nair P, *et al.* Benralizumab, an anti-interleukin-5 receptor  $\alpha$  monoclonal antibody, as add-on treatment for patients with severe, uncontrolled, eosinophilic asthma (CALIMA): a randomised, double-blind, placebo-controlled phase 3 trial. *Lancet* 2016; 388: 2128–2141.

6. ClinicalTrials.gov. Efficacy and safety study of benralizumab to reduce OCS use in patients with uncontrolled asthma on high dose inhaled corticosteroid plus LABA and chronic OCS therapy (NCT02075255). <https://ClinicalTrials.gov/show/NCT02075255>. Date last updated: October 17 2017. Date last accessed: March 20 2018.
7. Nair P, Wenzel S, Rabe K, *et al*. Oral glucocorticoid-sparing effect of benralizumab in severe asthma. *N Engl J Med* 2017; 376: 2448–2458.
8. ClinicalTrials.gov. Study to evaluate the efficacy and eafety of MEDI-563 in adults with uncontrolled asthma. <https://ClinicalTrials.gov/show/NCT01238861>. Date last updated: November 17 2016. Date last accessed: March 20 2018.
9. Castro M, Wenzel SE, Bleecker ER, *et al*. Benralizumab, an anti-interleukin 5 receptor alpha monoclonal antibody, versus placebo for uncontrolled eosinophilic asthma: a phase 2b randomised dose-ranging study. *Lancet Respir Med* 2014; 2: 879–890.
10. ClinicalTrials.gov. A Phase IIa study of KHK4563 (NCT01412736). <https://ClinicalTrials.gov/show/NCT01412736>. Date last updated: December 23 2014. Date last accessed: March 20 2018.
11. Park HS, Kim MK, Imai N, *et al*. A Phase 2a study of benralizumab for patients with eosinophilic asthma in South Korea and Japan. *Int Arch Allergy Immunol* 2016; 169: 135–145.
12. ClinicalTrials.gov. Efficacy and safety study of benralizumab added to medium-dose inhaled corticosteroid plus LABA in patients with uncontrolled asthma (NCT01947946). <https://ClinicalTrials.gov/show/NCT01947946>. Date last updated: November 24 2015. Date last accessed: March 20 2018.

13. ClinicalTrials.gov. A Phase 2 study to evaluate the safety and efficacy of intravenously administered MEDI-563 (NCT00768079).  
<https://ClinicalTrials.gov/show/NCT00768079>. Date last updated: July 18 2016. Date last accessed: March 20 2018.
14. Nowak RM, Parker JM, Silverman RA, *et al.* A randomized trial of benralizumab, an antiinterleukin 5 receptor alpha monoclonal antibody, after acute asthma. *Am J Emerg Med* 2015; 33: 14–20.
15. ClinicalTrials.gov. Efficacy and safety study of mepolizumab adjunctive therapy in subjects with severe uncontrolled refractory asthma (NCT01691521).  
<https://ClinicalTrials.gov/show/NCT01691521>. Date last updated: October 6 2017. Date last accessed: March 21 2018.
16. Ortega H, Liu MC, Pavord ID, *et al.* Mepolizumab treatment in patients with severe eosinophilic asthma. *N Engl J Med* 2014; 371: 1198–1207.
17. ClinicalTrials.gov. Dose ranging efficacy and safety with mepolizumab in severe asthma (NCT01000506). <https://ClinicalTrials.gov/show/NCT01000506>. Date last updated: January 24 2018. Date last accessed: March 22 2018.
18. Pavord ID, Korn S, Howarth P, *et al.* Mepolizumab for severe eosinophilic asthma (DREAM): a multicentre, double-blind, placebo-controlled trial. *Lancet* 2012; 380: 651–659.
19. ClinicalTrials.gov. Mepolizumab steroid-sparing study in subjects with severe refractory asthma (NCT01691508). <https://ClinicalTrials.gov/show/NCT01691508>. Date last updated: March 23 2017. Date last accessed: March 22 2018.

20. Bel E, Wenzel S, Thompson P, *et al.* Oral glucocorticoid-sparing effect of mepolizumab in eosinophilic asthma. *N Engl J Med* 2014; 371: 1189–1197.
21. ISRCTN.com. Mepolizumab and exacerbation frequency in refractory eosinophilic asthma: a randomised, double blind, placebo controlled trial (ISRCTN75169762). <http://www.isrctn.com/ISRCTN75169762>. Date last updated: October 3 2009. Date last accessed: March 22 2018.
22. Haldar P, Brightling C, Hargadon B. Mepolizumab and exacerbations of refractory eosinophilic asthma. *N Engl J Med* 2009; 360: 973–984.
23. ClinicalTrials.gov. The prednisone-sparing effect of anti-IL-5 antibody (SB-240563) (NCT00292877). <https://ClinicalTrials.gov/show/NCT00292877>. Date last updated: January 24 2011. Date last accessed: March 22 2018.
24. Nair P, Pizzichini M, Kjarsgaard M, Inman M. Mepolizumab for prednisone-dependent asthma with sputum eosinophilia. *N Engl J Med* 2009; 360: 985–993.
25. ClinicalTrials.gov. A study to evaluate the efficacy and safety of reslizumab (3.0 mg/kg) in the reduction of clinical asthma exacerbations in patients (12-75 years of age) with eosinophilic asthma (NCT01287039). <https://ClinicalTrials.gov/show/NCT01287039>. Date last updated: June 27 2016. Date last accessed: March 22 2018.
26. Castro M, Zangrilli J, Wechsler ME, *et al.* Reslizumab for inadequately controlled asthma with elevated blood eosinophil counts: results from two multicentre, parallel, double-blind, randomised, placebo-controlled, phase 3 trials. *Lancet Respir Med* 2015; 3: 355–366.
27. ClinicalTrials.gov. A study to evaluate the efficacy and safety of reslizumab in patients with eosinophilic asthma (NCT01285323).



- <https://ClinicalTrials.gov/show/NCT01285323>. Date last updated: June 27 2016. Date last accessed: March 22 2018.
28. ClinicalTrials.gov. Efficacy and safety study of reslizumab to treat poorly controlled asthma (NCT00587288). <https://ClinicalTrials.gov/show/NCT00587288>. Date last updated: August 17 2016. Date last accessed: March 22 2018.
29. Castro M, Mathur S, Hargreave F, *et al*. Reslizumab for poorly controlled, eosinophilic asthma: a randomized, placebo-controlled study. *Am J Respir Crit Care Med* 2011; 184: 1125–1132.
